# Supplementary material for: Evolutionary Trajectories and Genomic Divergence in Localized Breast Cancers after Ipsilateral Breast Tumor Recurrence
Source: MDPI journal article supplement (doi:10.3390/cancers13081821), 2021-04-11
Supplement: s1 [file s1]

# Supplementary Materials:

## Evolutionary Trajectories and Genomic Divergence in Localized Breast Cancers after silateral Breast Tumor Recurrence

Chia-Hsin Wu, Hsien-Tang Yeh, Chia-Shan Hsieh, Chi-Cheng Huang, Amrita Chattopadhyay, Yuan-Chiang Chung, Shih-Hsin Tu, Yung-Hua Li, Tzu-Pin Lu, Liang-Chuan Lai, Ming-Feng Hou, King-Jen Chang, Mong-Hsun Tsai and Eric Y. Chuang

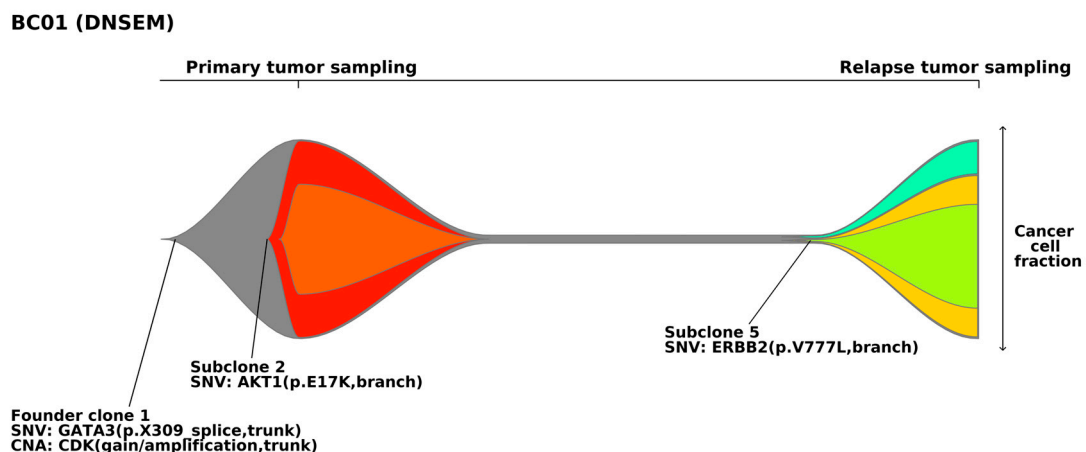

**Figure S1. Clonal architecture of primary and relapsed tumors in patient BC01 (DNSEM).** Fishplots indicate the clonal composition and the potential clonal selection during progression of primary tumors to relapse. The clonal architecture is derived from somatic single nucleotide variants, indels, and copy number alterations using PhyloWGS. The founder clones are shown in gray, while subclones are shown in other colors. Key alterations in the founder clone and subclones are highlighted, with mutations in driver genes identified at both the clonal and subclonal level. Tumors with the phenotype of homologous recombination deficiency are also annotated. The cancer cell fraction of each clone could be inferred at the time of primary and relapse sampling. DESNM: de novo subclone evolution model.

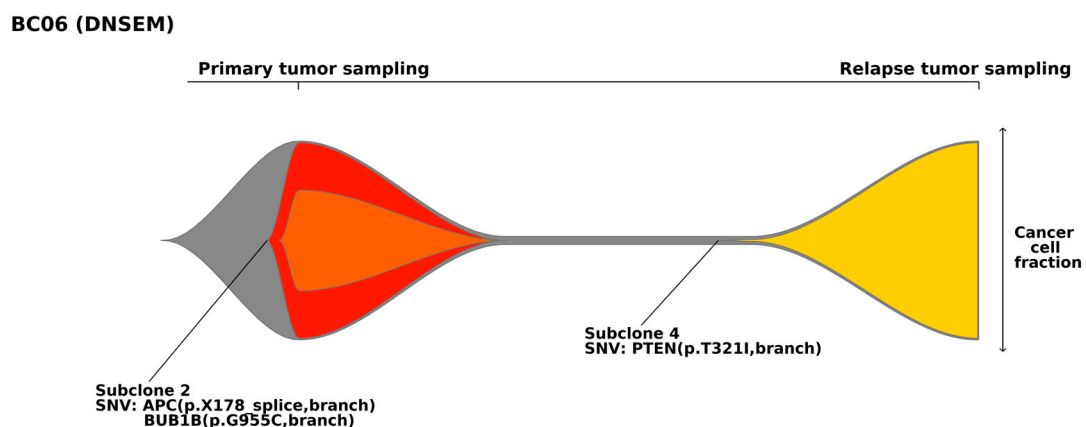

**Figure S2. Clonal architecture of primary and relapsed tumors in patient BC06 (DNSEM).** Fishplots indicate the clonal composition and the potential clonal selection during progression of primary tumors to relapse. The clonal architecture is

derived from somatic single nucleotide variants, indels, and copy number alterations using PhyloWGS. The founder clones are shown in gray, while subclones are shown in other colors. Key alterations in the founder clone and subclones are highlighted, with mutations in driver genes identified at both the clonal and subclonal level. Tumors with the phenotype of homologous recombination deficiency are also annotated. The cancer cell fraction of each clone could be inferred at the time of primary and relapse sampling. DNSEM: de novo subclone evolution model.

#### BC10 (DNSEM)

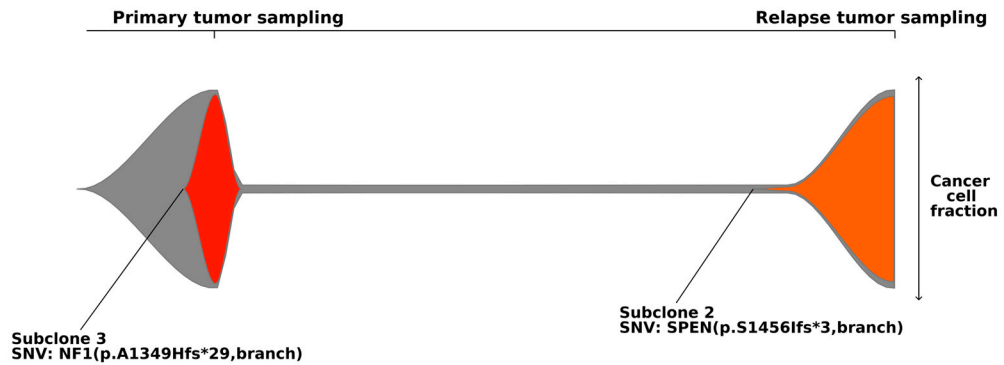

**Figure S3.** Clonal architecture of primary and relapsed tumors in patient BC10 (DNSEM). Fishplots indicate the clonal composition and the potential clonal selection during progression of primary tumors to relapse. The clonal architecture is derived from somatic single nucleotide variants, indels, and copy number alterations using PhyloWGS. The founder clones are shown in gray, while subclones are shown in other colors. Key alterations in the founder clone and subclones are highlighted, with mutations in driver genes identified at both the clonal and subclonal level. Tumors with the phenotype of homologous recombination deficiency are also annotated. The cancer cell fraction of each clone could be inferred at the time of primary and relapse sampling. DNSEM: de novo subclone evolution model.

#### BC02 (HRDEM)

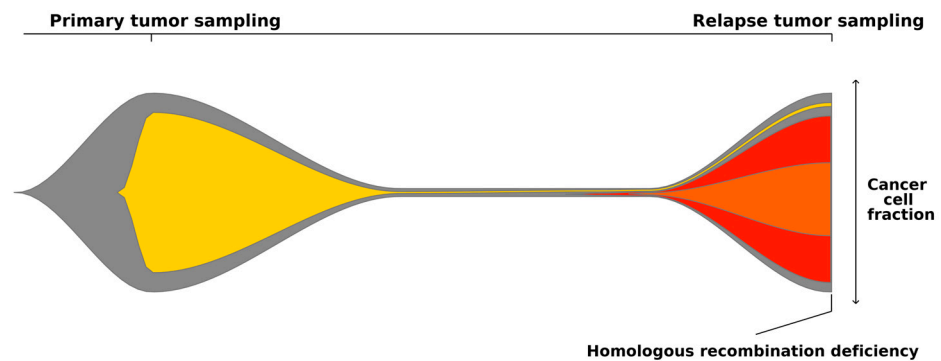

**Figure S4.** Clonal architecture of primary and relapsed tumors in patient BC02 (HRDEM). Fishplots indicate the clonal composition and the potential clonal selection during progression of primary tumors to relapse. The clonal architecture is derived from somatic single nucleotide variants, indels, and copy number alterations using PhyloWGS. The founder clones are shown in gray, while subclones are shown in other colors. Key alterations in the founder clone and subclones are highlighted, with mutations in driver genes identified at both the clonal and subclonal level. Tumors with the phenotype of homologous recombination deficiency are also annotated. The cancer cell fraction of each clone could be inferred at the time of primary and relapse sampling. HRDEM: HRD evolution model.

### BC07 (HRDEM)

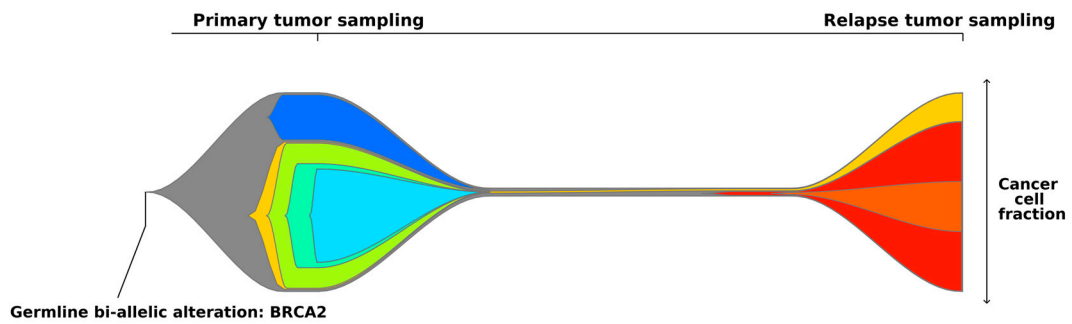

**Figure S5.** Clonal architecture of primary and relapsed tumors in patient BC07 (HRDEM). Fishplots indicate the clonal composition and the potential clonal selection during progression of primary tumors to relapse. The clonal architecture is derived from somatic single nucleotide variants, indels, and copy number alterations using PhyloWGS. The founder clones are shown in gray, while subclones are shown in other colors. Key alterations in the founder clone and subclones are highlighted, with mutations in driver genes identified at both the clonal and subclonal level. Tumors with the phenotype of homologous recombination deficiency are also annotated. The cancer cell fraction of each clone could be inferred at the time of primary and relapse sampling. HRDEM: HRD evolution model.

### BC04 (SEEM)

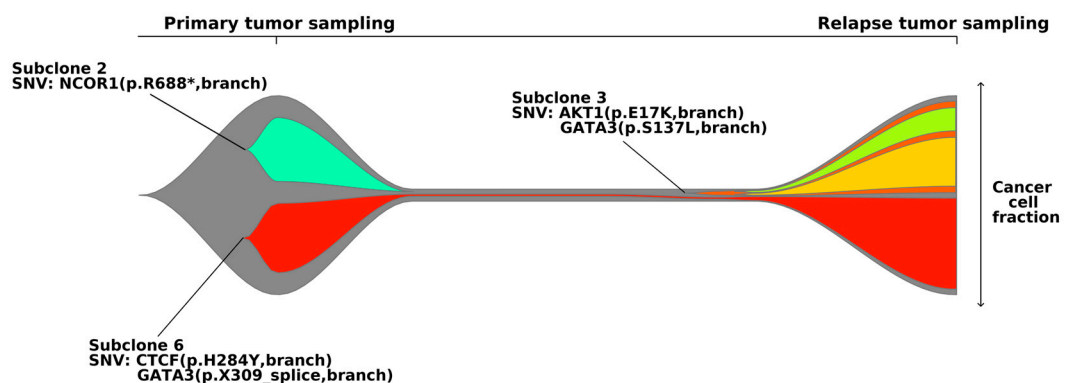

**Figure S6.** Clonal architecture of primary and relapsed tumors in patient BC04 (SEEM). Fishplots indicate the clonal composition and the potential clonal selection during progression of primary tumors to relapse. The clonal architecture is derived from somatic single nucleotide variants, indels, and copy number alterations using PhyloWGS. The founder clones are shown in gray, while subclones are shown in other colors. Key alterations in the founder clone and subclones are highlighted, with mutations in driver genes identified at both the clonal and subclonal level. Tumors with the phenotype of homologous recombination deficiency are also annotated. The cancer cell fraction of each clone could be inferred at the time of primary and relapse sampling. SEEM: selective expansion evolution model.

# BC08 (SEEM)

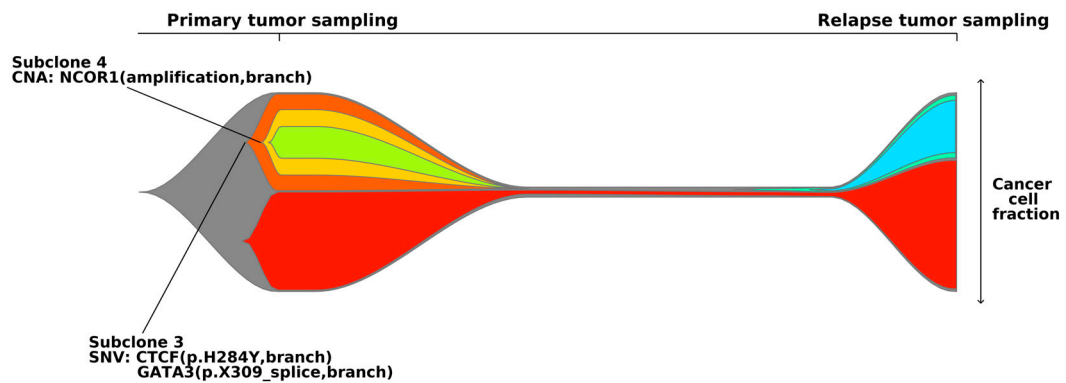

**Figure S7.** Clonal architecture of primary and relapsed tumors in patient BC08 (SEEM). Fishplots indicate the clonal composition and the potential clonal selection during progression of primary tumors to relapse. The clonal architecture is derived from somatic single nucleotide variants, indels, and copy number alterations using PhyloWGS. The founder clones are shown in gray, while subclones are shown in other colors. Key alterations in the founder clone and subclones are highlighted, with mutations in driver genes identified at both the clonal and subclonal level. Tumors with the phenotype of homologous recombination deficiency are also annotated. The cancer cell fraction of each clone could be inferred at the time of primary and relapse sampling. SEEM: selective expansion evolution model.

**Table S1.** Patient and Sample Characteristics.

| Characteristics                                     | Patients (n = 10)* |
|-----------------------------------------------------|--------------------|
| Age, years                                          |                    |
| Median (interquartile range)                        | 47.0 (36.8–64.5)   |
| Distribution                                        |                    |
| ≤40                                                 | 4 (40.0)           |
| 41–50                                               | 3 (30.0)           |
| 51–60                                               | 0 (0)              |
| 61–70                                               | 2 (20.0)           |
| >70                                                 | 1 (10.0)           |
| Relapse after primary diagnosis, month              |                    |
| Median (interquartile range)                        | 45.0 (23.3–59.7)   |
| Pathologic stage                                    |                    |
| I                                                   | 5 (50.0)           |
| II                                                  | 5 (50.0)           |
| III                                                 | 0 (0)              |
| IV                                                  | 0 (0)              |
| Histologic grade of tumor                           |                    |
| Low                                                 | 2 (20.0)           |
| Intermediate                                        | 7 (70.0)           |
| High                                                | 0 (0)              |
| Missing                                             | 1 (10.0)           |
| Estrogen receptor expression                        |                    |
| Negative                                            | 3 (30.0)           |
| Positive                                            | 7 (70.0)           |
| Progesterone receptor expression                    |                    |
| Negative                                            | 5 (50.0)           |
| Positive                                            | 5 (50.0)           |
| Human epidermal growth factor 2 receptor expression |                    |
| Negative                                            | 6 (60.0)           |

|                                    |          |
|------------------------------------|----------|
| Positive                           | 2 (20.0) |
| Missing                            | 2 (20.0) |
| Immunohistochemical classification |          |
| HR+/HER2-                          | 5 (50.0) |
| HR+/HER2+                          | 1 (10.0) |
| HER2+                              | 1 (10.0) |
| TNBC                               | 1 (10.0) |
| Missing                            | 2 (20.0) |

HR, hormone receptor; HER, human epidermal growth factor 2 receptor; TNBC, triple-negative breast cancer; \* All values are presented as n (%) unless otherwise indicated.

**Table S2.** Treatment histories of patients.

| Case ID | Surgery                   | Chemotherapy                           | Radiotherapy | Hormone therapy | Targeted Therapy |
|---------|---------------------------|----------------------------------------|--------------|-----------------|------------------|
| BC 01   | Wide excision             |                                        |              |                 |                  |
| BC 02   | Simple mastectomy + SLNB  | Endoxan, Pharmorubicin + Taxotere      | Yes          |                 | Herceptin        |
| BC 03   | Partial mastectomy + ALND |                                        | Yes          | Tamoxifen       |                  |
| BC 04   | Partial mastectomy + ALND | Endoxan, Pharmorubicin, 5FU + Taxotere | Yes          | Tamoxifen       | Herceptin        |
| BC 05   | Simple mastectomy + SLNB  | Endoxan, Pharmorubicin, 5FU + Taxotere |              | Tamoxifen       |                  |
| BC 06   | Partial mastectomy + ALND |                                        | Yes          | Tamoxifen       |                  |
| BC 07   | Partial mastectomy + ALND |                                        | Yes          | Tamoxifen       |                  |
| BC 08   | Partial mastectomy + SLNB | Endoxan, Pharmorubicin, 5FU            | Yes          |                 |                  |
| BC 09   | Simple mastectomy + SLNB  |                                        |              | Tamoxifen       |                  |
| BC 10   | MRM                       | Endoxan, Pharmorubicin, 5FU            |              |                 |                  |

SLNB: sentinel lymph node biopsy; ALND: axillary lymph node dissection; MRM: modified radical mastectomy; 5FU: 5-Flurouracie.

**Table S3.** Curated driver genes of breast cancer.

| Gene            | Yates, L.R. et al., 2017 | Bertucci, F. et al., 2019 | Angus, L. et al., 2019 | Bailey, M.H. et al., 2018 | Nik-Zainal, S. et al., 2016 | Present in our primary cohort | Present in our re-lapse cohort |
|-----------------|--------------------------|---------------------------|------------------------|---------------------------|-----------------------------|-------------------------------|--------------------------------|
| <i>PIK3CA</i>   | Yes                      | Yes                       | Yes                    | Yes                       | Yes                         | Yes                           | Yes                            |
| <i>TP53</i>     | Yes                      | Yes                       | Yes                    | Yes                       | Yes                         | Yes                           |                                |
| <i>GATA3</i>    | Yes                      | Yes                       | Yes                    | Yes                       | Yes                         | Yes                           | Yes                            |
| <i>CDH1</i>     | Yes                      | Yes                       | Yes                    | Yes                       | Yes                         |                               |                                |
| <i>MAP3K1</i>   | Yes                      | Yes                       | Yes                    | Yes                       | Yes                         |                               | Yes                            |
| <i>MLL3</i>     | Yes                      |                           |                        |                           | Yes                         |                               |                                |
| <i>NCOR1</i>    | Yes                      | Yes                       | Yes                    | Yes                       | Yes                         | Yes                           |                                |
| <i>MAP2K4</i>   | Yes                      | Yes                       | Yes                    | Yes                       | Yes                         |                               |                                |
| <i>PTEN</i>     | Yes                      | Yes                       | Yes                    | Yes                       | Yes                         |                               | Yes                            |
| <i>AKT1</i>     | Yes                      | Yes                       | Yes                    | Yes                       | Yes                         | Yes                           | Yes                            |
| <i>ARID1A</i>   | Yes                      |                           | Yes                    | Yes                       | Yes                         |                               |                                |
| <i>ERBB2</i>    | Yes                      |                           | Yes                    | Yes                       | Yes                         |                               | Yes                            |
| <i>TBX3</i>     | Yes                      | Yes                       | Yes                    | Yes                       | Yes                         |                               |                                |
| <i>CDKN1B</i>   | Yes                      |                           | Yes                    | Yes                       | Yes                         |                               |                                |
| <i>RB1</i>      | Yes                      | Yes                       | Yes                    | Yes                       | Yes                         |                               |                                |
| <i>CTCF</i>     | Yes                      |                           |                        | Yes                       | Yes                         | Yes                           | Yes                            |
| <i>FOXA1</i>    | Yes                      | Yes                       | Yes                    | Yes                       | Yes                         |                               |                                |
| <i>PIK3R1</i>   | Yes                      | Yes                       |                        | Yes                       | Yes                         |                               |                                |
| <i>NF1</i>      | Yes                      | Yes                       | Yes                    | Yes                       | Yes                         | Yes                           |                                |
| <i>CBFB</i>     | Yes                      | Yes                       | Yes                    | Yes                       | Yes                         |                               |                                |
| <i>BRCA1</i>    | Yes                      |                           |                        | Yes                       | Yes                         |                               |                                |
| <i>RUNX1</i>    | Yes                      | Yes                       | Yes                    | Yes                       | Yes                         |                               |                                |
| <i>HIST1H3B</i> | Yes                      |                           |                        |                           |                             |                               |                                |
| <i>JAK2</i>     | Yes                      |                           |                        |                           |                             |                               |                                |
| <i>STAT3</i>    | Yes                      |                           |                        |                           |                             |                               |                                |
| <i>ARID1B</i>   | Yes                      |                           |                        |                           | Yes                         |                               |                                |
| <i>CASP8</i>    |                          |                           |                        | Yes                       | Yes                         |                               |                                |
| <i>CHD4</i>     |                          |                           |                        | Yes                       |                             |                               |                                |
| <i>FBXW7</i>    |                          | Yes                       |                        | Yes                       | Yes                         |                               |                                |
| <i>GPS2</i>     |                          |                           | Yes                    | Yes                       |                             |                               |                                |
| <i>KMT2C</i>    |                          | Yes                       | Yes                    | Yes                       |                             |                               |                                |
| <i>KRAS</i>     |                          | Yes                       |                        | Yes                       | Yes                         |                               |                                |
| <i>PTPRD</i>    |                          |                           |                        | Yes                       |                             |                               |                                |
| <i>SF3B1</i>    |                          |                           |                        | Yes                       | Yes                         | Yes                           | Yes                            |
| <i>AKT2</i>     |                          |                           |                        |                           | Yes                         |                               |                                |
| <i>APC</i>      |                          |                           |                        |                           | Yes                         | Yes                           |                                |
| <i>ASXL1</i>    |                          |                           |                        |                           | Yes                         |                               |                                |
| <i>ATM</i>      |                          |                           |                        |                           | Yes                         |                               |                                |
| <i>ATR</i>      |                          |                           |                        |                           | Yes                         |                               |                                |
| <i>ATRX</i>     |                          |                           |                        |                           | Yes                         |                               |                                |
| <i>AXIN1</i>    |                          |                           |                        |                           | Yes                         |                               |                                |
| <i>BCOR</i>     |                          |                           |                        |                           | Yes                         |                               |                                |
| <i>BRAF</i>     |                          |                           |                        |                           | Yes                         |                               |                                |
| <i>BRCA2</i>    |                          |                           |                        |                           | Yes                         |                               | Yes                            |
| <i>BUB1B</i>    |                          |                           |                        |                           | Yes                         | Yes                           |                                |
| <i>CBLB</i>     |                          |                           |                        |                           | Yes                         |                               |                                |
| <i>CDKN2A</i>   |                          |                           |                        |                           | Yes                         |                               |                                |
| <i>CIC</i>      |                          |                           |                        |                           | Yes                         |                               |                                |
| <i>CNOT3</i>    |                          |                           |                        |                           | Yes                         |                               |                                |
| <i>CREBBP</i>   |                          |                           |                        |                           | Yes                         |                               |                                |
| <i>CUX1</i>     |                          |                           |                        |                           | Yes                         |                               |                                |
| <i>DNMT3A</i>   |                          |                           |                        |                           | Yes                         |                               |                                |
| <i>ECT2L</i>    |                          |                           |                        |                           | Yes                         |                               |                                |
| <i>EGFR</i>     |                          |                           |                        |                           | Yes                         |                               |                                |
| <i>ERBB3</i>    |                          |                           |                        |                           | Yes                         |                               |                                |

|         |     |     |     |     |
|---------|-----|-----|-----|-----|
| ERCC4   |     |     | Yes |     |
| ESR1    | Yes | Yes | Yes |     |
| FGFR2   |     |     | Yes |     |
| FOXP1   |     |     | Yes |     |
| HRAS    |     |     | Yes |     |
| KDM6A   |     |     | Yes |     |
| MED23   |     |     | Yes |     |
| MEN1    |     |     | Yes |     |
| MLH1    |     |     | Yes |     |
| MLL2    |     |     | Yes |     |
| MLLT4   |     |     | Yes |     |
| MSH2    |     |     | Yes |     |
| NF2     |     |     | Yes |     |
| NOTCH1  |     |     | Yes |     |
| NOTCH2  |     |     | Yes |     |
| NRAS    |     |     | Yes |     |
| PALB2   |     |     | Yes | Yes |
| PBRM1   |     |     | Yes |     |
| PHF6    |     |     | Yes |     |
| PMS2    |     |     | Yes |     |
| PRDM1   |     |     | Yes |     |
| PREX2   |     |     | Yes |     |
| RHOA    |     |     | Yes |     |
| SETD2   |     |     | Yes |     |
| SMAD4   |     |     | Yes |     |
| SMARCA4 |     |     | Yes |     |
| SPEN    |     |     | Yes | Yes |
| STAG2   |     |     | Yes |     |
| STK11   |     |     | Yes |     |
| TET2    |     |     | Yes |     |
| USP9X   |     |     | Yes |     |
| XBP1    |     |     | Yes |     |
| ZFP36L1 |     |     | Yes | Yes |
| GNAS    |     |     | Yes | Yes |
| RIC8A   | Yes |     |     |     |

---
